# Supplementary material
Source: publisher site journal article supplement (https://www.spandidos-publications.com/1342/downloadSupplementary)

Figure S1. Optimization experiment for FBS. VSMCs stopped proliferating in 1% FBS. VSMCs, vascular smooth muscle cells.

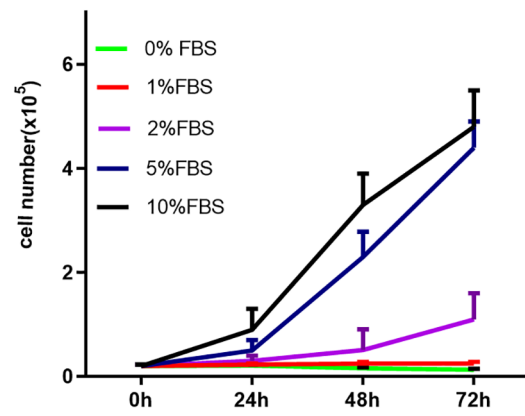

Supplement: Supplementary file 1 [file downloadSupplementary]
